# Supplementary material for: Spinal pain in pre-adolescence and the relation with screen time and physical activity behavior
Source: PubMed Central journal article supplement (PMC8077847; doi:10.1186/s12891-021-04263-z), 2021-04-26
Supplement: 12891_2021_4263_MOESM2_ESM.pdf [file 12891_2021_4263_MOESM2_ESM.pdf]

**Additional file 2**

Characteristics of the 45,555 pre-adolescents included in the study population according to physical activity behavior (11-year follow-up, The Danish National Birth Cohort, born 1996-2003)

| Characteristics                             | Physical activity behavior <sup>a</sup> |                    |                       |                       |
|---------------------------------------------|-----------------------------------------|--------------------|-----------------------|-----------------------|
|                                             | Inactive (%)                            | Lightly active (%) | Moderately active (%) | Vigorously active (%) |
| Total <sup>b</sup>                          | 11.4                                    | 44.9               | 39.2                  | 4.5                   |
| SBA (h/day)                                 |                                         |                    |                       |                       |
| < 2                                         | 14.5                                    | 20.5               | 25.3                  | 31.1                  |
| 2 to < 4                                    | 43.3                                    | 47.6               | 50.8                  | 49.0                  |
| 4 to < 6                                    | 26.3                                    | 22.2               | 18.0                  | 15.7                  |
| ≥ 6                                         | 16.0                                    | 9.7                | 5.9                   | 4.2                   |
| Sex                                         |                                         |                    |                       |                       |
| Boys                                        | 33.3                                    | 47.2               | 51.7                  | 54.0                  |
| Girls                                       | 66.7                                    | 52.8               | 48.3                  | 46.0                  |
| Age                                         |                                         |                    |                       |                       |
| 11 years                                    | 82.0                                    | 85.7               | 83.8                  | 77.7                  |
| 12 years                                    | 18.0                                    | 14.3               | 16.2                  | 22.3                  |
| Parental educational level <sup>c</sup>     |                                         |                    |                       |                       |
| High                                        | 63.9                                    | 65.1               | 70.1                  | 71.7                  |
| Medium                                      | 33.3                                    | 32.5               | 28.9                  | 27.4                  |
| Low                                         | 2.9                                     | 2.3                | 1.0                   | 0.9                   |
| Equivalised household income <sup>c</sup>   |                                         |                    |                       |                       |
| 4 <sup>th</sup> quartile (highest)          | 28.9                                    | 32.3               | 41.0                  | 44.0                  |
| 3 <sup>rd</sup> quartile                    | 29.5                                    | 30.4               | 31.5                  | 30.8                  |
| 2 <sup>nd</sup> quartile                    | 27.3                                    | 24.5               | 19.2                  | 17.4                  |
| 1 <sup>st</sup> quartile (lowest)           | 14.3                                    | 12.7               | 8.3                   | 7.9                   |
| Family type                                 |                                         |                    |                       |                       |
| Living with both parents                    | 71.7                                    | 75.2               | 82.6                  | 87.0                  |
| Not living with (both) parents <sup>d</sup> | 28.3                                    | 24.8               | 17.4                  | 13.0                  |
| Parity                                      |                                         |                    |                       |                       |
| Nulliparous                                 | 50.5                                    | 48.2               | 48.2                  | 44.0                  |
| Parous                                      | 49.5                                    | 51.8               | 51.9                  | 56.0                  |

a Variables were analyzed with the chi-squared test of heterogeneity. Chi-squared tests were statistically significant for all variables

b For total distribution of physical activity behavior, row percentage is shown; for all the covariates column percentages are shown.

c Measured at age 11

d Parents not living together due to divorce, separation, they never lived together or only one parent alive.
