# Supplementary material for: Spinal pain in pre-adolescence and the relation with screen time and physical activity behavior
Source: PubMed Central journal article supplement (PMC8077847; doi:10.1186/s12891-021-04263-z), 2021-04-26
Supplement: 12891_2021_4263_MOESM9_ESM.pdf [file 12891_2021_4263_MOESM9_ESM.pdf]

**Additional file 9**

Relative risk ratio (RRR) of spinal according to screen-based activity and physical activity, respectively, among the 45,555 pre-adolescents included in the study population, with further adjustment for general wellbeing and Stress in Children scale. (The Danish National Birth Cohort, born 1996-2003)

|                            | Model 1 <sup>ab</sup>           |                               |                             | Model 2 <sup>ac</sup>         |                             |
|----------------------------|---------------------------------|-------------------------------|-----------------------------|-------------------------------|-----------------------------|
|                            | No. of cases<br>Moderate/Severe | Moderate pain<br>RRR (95% CI) | Severe pain<br>RRR (95% CI) | Moderate pain<br>RRR (95% CI) | Severe pain<br>RRR (95% CI) |
| SBA, Girls (h/day)         |                                 |                               |                             |                               |                             |
| < 2                        | 1,434/466                       | Ref.                          | Ref.                        | Ref.                          | Ref.                        |
| 2 to < 4                   | 3,053/928                       | 1.20 (1.11-1.28)              | 1.19 (1.08-1.31)            | 1.20 (1.12-1.29)              | 1.19 (1.08-1.32)            |
| 4 to < 6                   | 1,135/392                       | 1.35 (1.23-1.48)              | 1.34 (1.19-1.52)            | 1.34 (1.22-1.47)              | 1.30 (1.15-1.48)            |
| ≥ 6                        | 445/200                         | 1.55 (1.36-1.77)              | 2.11 (1.80-2.48)            | 1.49 (1.30-1.70)              | 1.94 (1.64-2.28)            |
| SBA, Boys (h/day)          |                                 |                               |                             |                               |                             |
| < 2                        | 781/177                         | Ref.                          | Ref.                        | Ref.                          | Ref.                        |
| 2 to < 4                   | 2,247/616                       | 1.07 (0.98-1.18)              | 1.15 (1.00-1.33)            | 1.07 (0.98-1.17)              | 1.14 (0.99-1.32)            |
| 4 to < 6                   | 1,345/376                       | 1.20 (1.18-1.40)              | 1.30 (1.11-2.08)            | 1.18 (1.07-1.30)              | 1.25 (1.07-1.47)            |
| ≥ 6                        | 640/226                         | 1.21 (1.07-1.36)              | 1.73 (1.45-2.06)            | 1.15 (1.02-1.30)              | 1.56 (1.31-1.87)            |
| Physical activity behavior |                                 |                               |                             |                               |                             |
| Inactive                   | 1,356/475                       | 1.02 (0.95-1.10)              | 1.03 (0.93-1.14)            | 0.98 (0.91-1.06)              | 0.96 (0.87-1.06)            |
| Lightly active             | 5,145/1,598                     | 1.06 (1.01-1.11)              | 1.04 (0.97-1.11)            | 1.05 (1.01-1.10)              | 1.02 (0.95-1.09)            |
| Moderately active          | 4,107/1,162                     | Ref.                          | Ref.                        | Ref.                          | Ref.                        |
| Vigorously active          | 472/146                         | 1.02 (0.92-1.14)              | 1.12 (0.97-1.31)            | 1.02 (0.92-1.13)              | 1.12 (0.97-1.31)            |

a Reference categories: For explanatory variables; less than 2 hours used on SBA daily and being moderately physically active, and for outcome variables; not having reported moderate or severe neck pain in DNBC-11 (No pain)

b Adjusted for general wellbeing, child's age, parity, family type, parental education, household income and simultaneously modeled for the interaction between SBA and child's sex, and physical activity behavior

c Adjusted for Stress in Children scale, child's age, parity, family type, parental education, household income and simultaneously modeled for the interaction between SBA and child's sex, and physical activity behavior
