# Supplementary material for: Spinal pain in pre-adolescence and the relation with screen time and physical activity behavior
Source: PubMed Central journal article supplement (PMC8077847; doi:10.1186/s12891-021-04263-z), 2021-04-26
Supplement: 12891_2021_4263_MOESM10_ESM.pdf [file 12891_2021_4263_MOESM10_ESM.pdf]

**Additional file 10**

Characteristics of the 90,978 participants invited to participate in DNBC-11 and included in the baseline cohort according to follow-up status at age 11

| Characteristics                           | Study population<br>45,555 (50.1) | Lost to follow-up <sup>a</sup><br>45,423 (49.9) |
|-------------------------------------------|-----------------------------------|-------------------------------------------------|
| Sex                                       |                                   |                                                 |
| Boys                                      | 21,711 (47.7)                     | 20,942 (46.1)                                   |
| Girls                                     | 23,844 (52.3)                     | 24,458 (53.9)                                   |
| Missing                                   | 0                                 | 25 (0.1)                                        |
| Parental educational level <sup>b</sup>   |                                   |                                                 |
| High                                      | 30,629 (67.2)                     | 23,761 (52.3)                                   |
| Medium                                    | 14,100 (31.0)                     | 19,551 (43.1)                                   |
| Low                                       | 826 (1.8)                         | 2,105 (4.6)                                     |
| Missing                                   | 0                                 | 6 (0.1)                                         |
| Equivalised household income <sup>b</sup> |                                   |                                                 |
| 4 <sup>th</sup> quartile (highest)        | 16,333 (35.9)                     | 12,130 (27.0)                                   |
| 3 <sup>rd</sup> quartile                  | 14,011 (30.8)                     | 12,201 (27.1)                                   |
| 2 <sup>nd</sup> quartile                  | 10,225 (22.4)                     | 11,865 (26.4)                                   |
| 1 <sup>st</sup> quartile (lowest)         | 4,986 (11.0)                      | 8,789 (19.5)                                    |
| Missing                                   | 0                                 | 438 (1.0)                                       |
| Parity                                    |                                   |                                                 |
| Nulliparous                               | 21,976 (48.2)                     | 20,721 (45.7)                                   |
| Parous                                    | 23,579 (51.8)                     | 24,642 (54.3)                                   |
| Missing                                   | 0                                 | 60 (0.1)                                        |
| Urbanization <sup>c</sup>                 |                                   |                                                 |
| Copenhagen                                | 6,433 (14.1)                      | 5,387 (11.9)                                    |
| Sub-urban Copenhagen                      | 4,888 (10.7)                      | 4,866 (10.7)                                    |
| Provincial cities                         | 6,715 (14.7)                      | 5,816 (12.8)                                    |
| Provincial towns                          | 13,203 (29.0)                     | 13,599 (30.0)                                   |
| Rural areas                               | 14,270 (31.3)                     | 15,675 (34.6)                                   |
| Missing                                   | 46 (0.1)                          | 81 (0.2)                                        |

a We used chi-squared tests of heterogeneity to compare study participants with individuals lost to follow-up. Chi-squared tests were statistically significant for all variables

b Measured at the year of the child's 11<sup>th</sup> birthday

c Urbanization registered at childbirth
